# Supplementary material for: Phosphorylation-Dependent Interactions between Crb2 and Chk1 Are Essential for DNA Damage Checkpoint
Source: PubMed Central journal article supplement (PMC3390401; doi:10.1371/journal.pgen.1002817), 2012-07-05

Qu et al. Figure S3

**A**

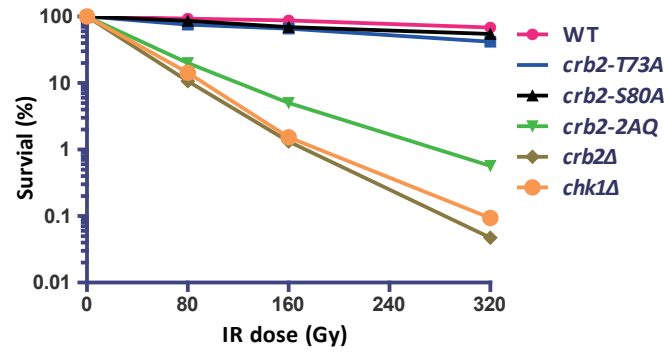

**B**

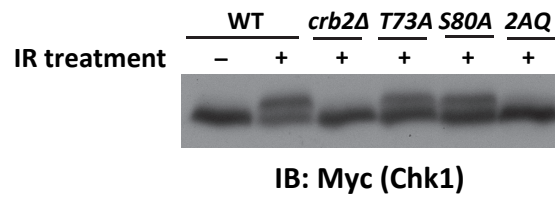

Supplement: pgen.1002817.s003.pdf [file pgen.1002817.s003.pdf]
