# Supplementary material for: Phosphorylation-Dependent Interactions between Crb2 and Chk1 Are Essential for DNA Damage Checkpoint
Source: PubMed Central journal article supplement (PMC3390401; doi:10.1371/journal.pgen.1002817), 2012-07-05
Supplement: pgen.1002817.s004.pdf [file pgen.1002817.s004.pdf]

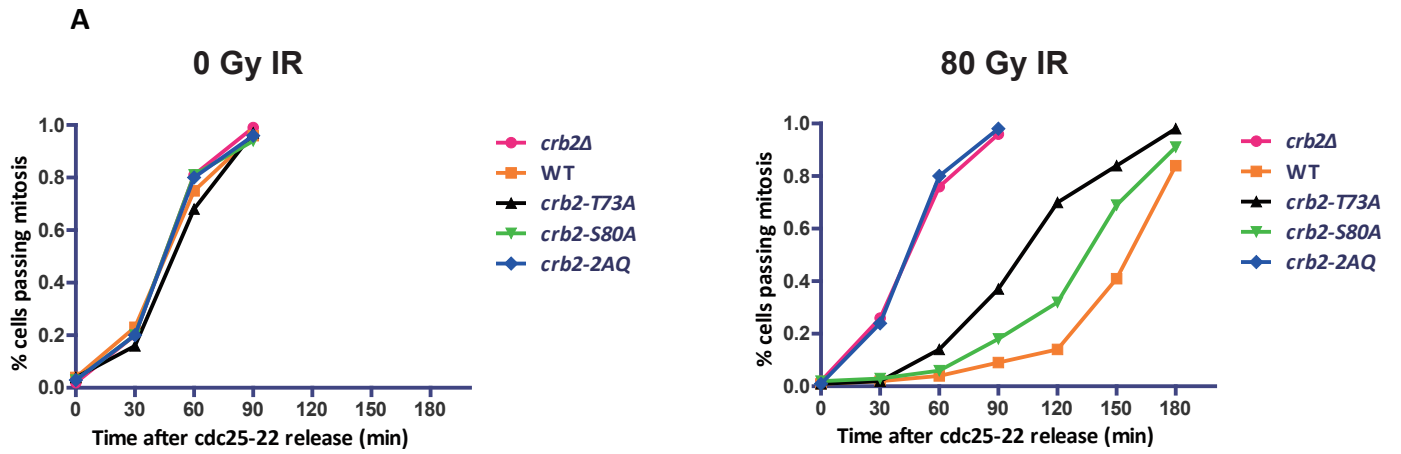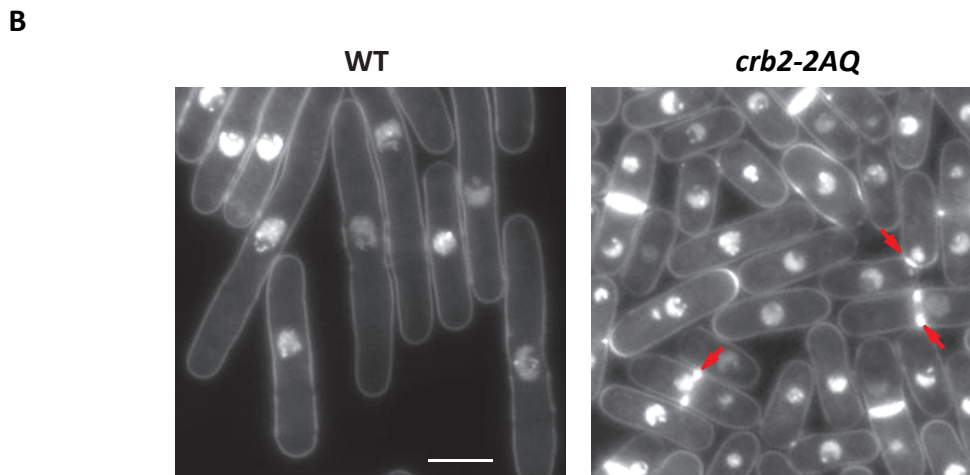

**C**

| <b><i>crb2-2AQ</i><br/>(N=121)</b> | 19% | 47% | 7% | 27% |
|------------------------------------|-----|-----|----|-----|
| <b><i>chk1Δ</i><br/>(N=58)</b>     | 21% | 43% | 7% | 29% |
| <b><i>crb2Δ</i><br/>(N=45)</b>     | 18% | 46% | 4% | 32% |
