# Supplementary material for: Phosphorylation-Dependent Interactions between Crb2 and Chk1 Are Essential for DNA Damage Checkpoint
Source: PubMed Central journal article supplement (PMC3390401; doi:10.1371/journal.pgen.1002817), 2012-07-05

Qu et al. Figure S5

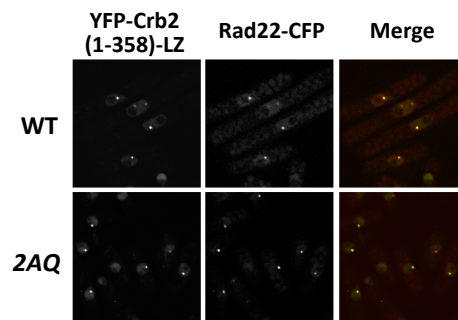

Supplement: pgen.1002817.s005.pdf [file pgen.1002817.s005.pdf]
